# Supplementary material for: Oxidative degradation of silica-supported polyethylenimine for CO2adsorption: insights into the nature of deactivated species
Source: Royal Society of Chemistry journal article supplement (doi:10.1039/c3cp53928h), 2013-11-20
Supplement: c3cp53928h.pdf [file c3cp53928h.pdf]

## **Supporting Information**

### **Oxidative Degradation of Silica-supported Polyethylenimine for CO<sub>2</sub> Adsorption: Insights into the Nature of Deactivated Species**

Asieh Ahmadalinezhad, and Abdelhamid Sayari\*

Department of Chemistry, Centre for Catalysis Research and Innovation (CCRI), University of  
Ottawa, Ottawa, Ontario, Canada K1N 6N5

\*E-mail: [abdel.sayari@uottawa.ca](mailto:abdel.sayari@uottawa.ca)

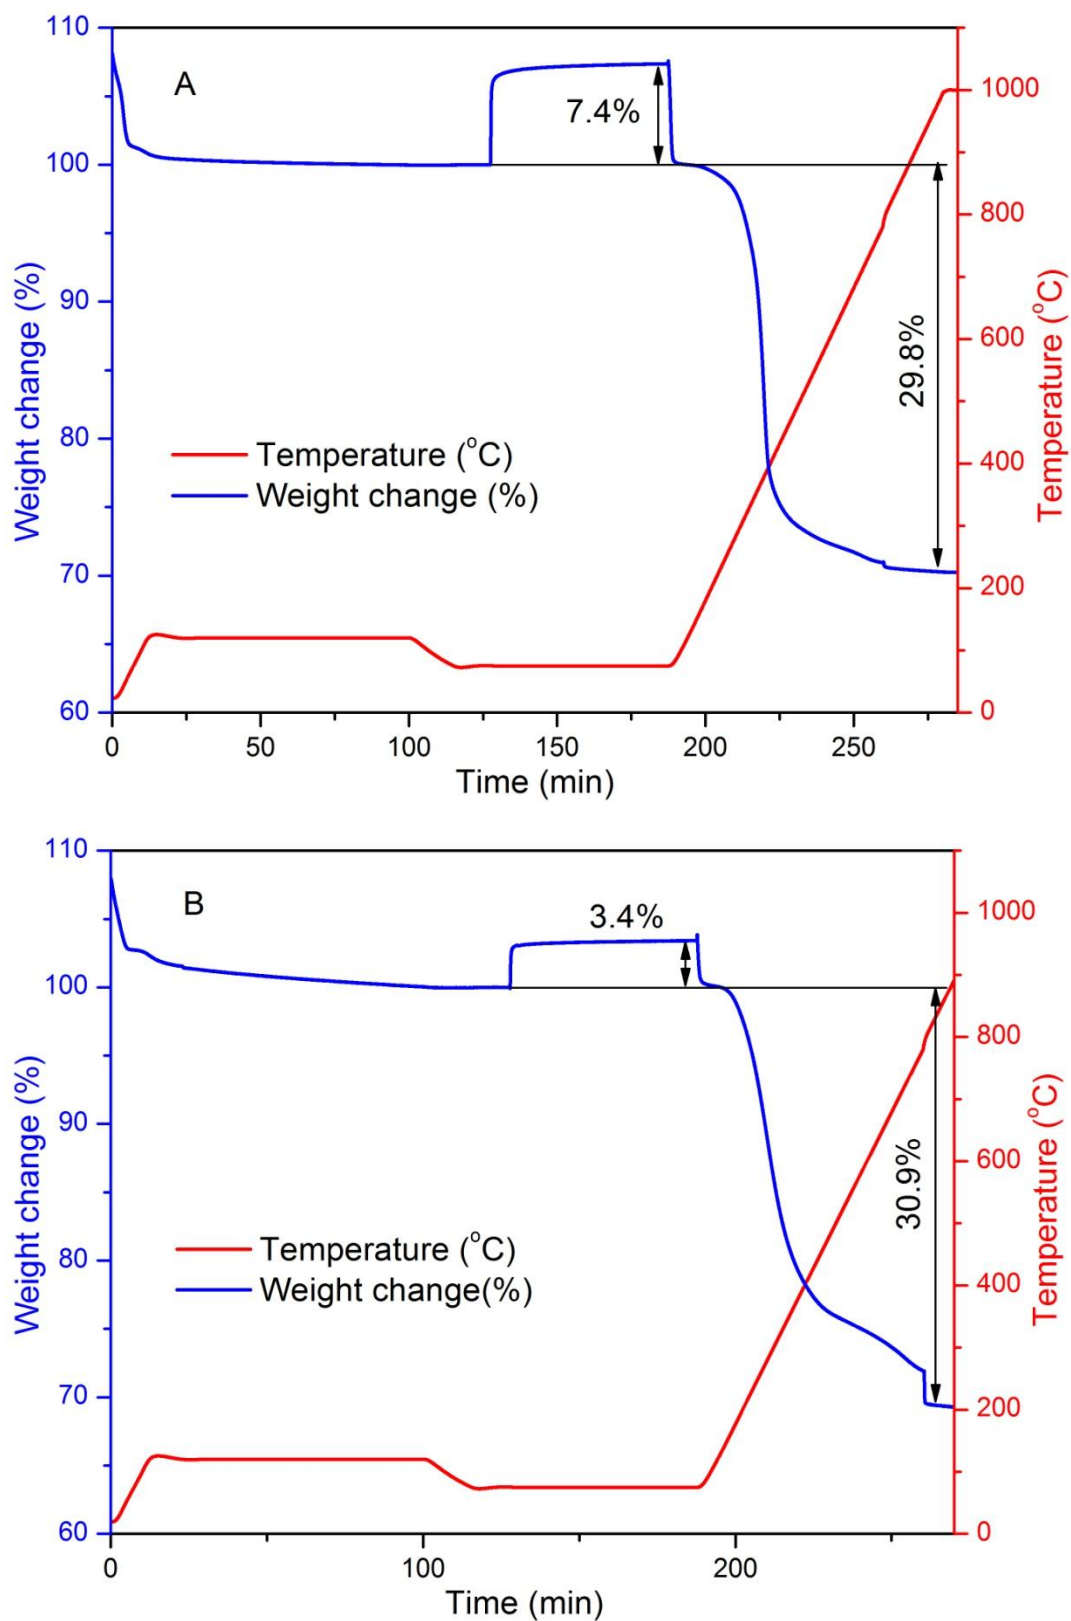

Fig. S1 CO<sub>2</sub> adsorption of LPEI before (A) and after (B) deactivation.

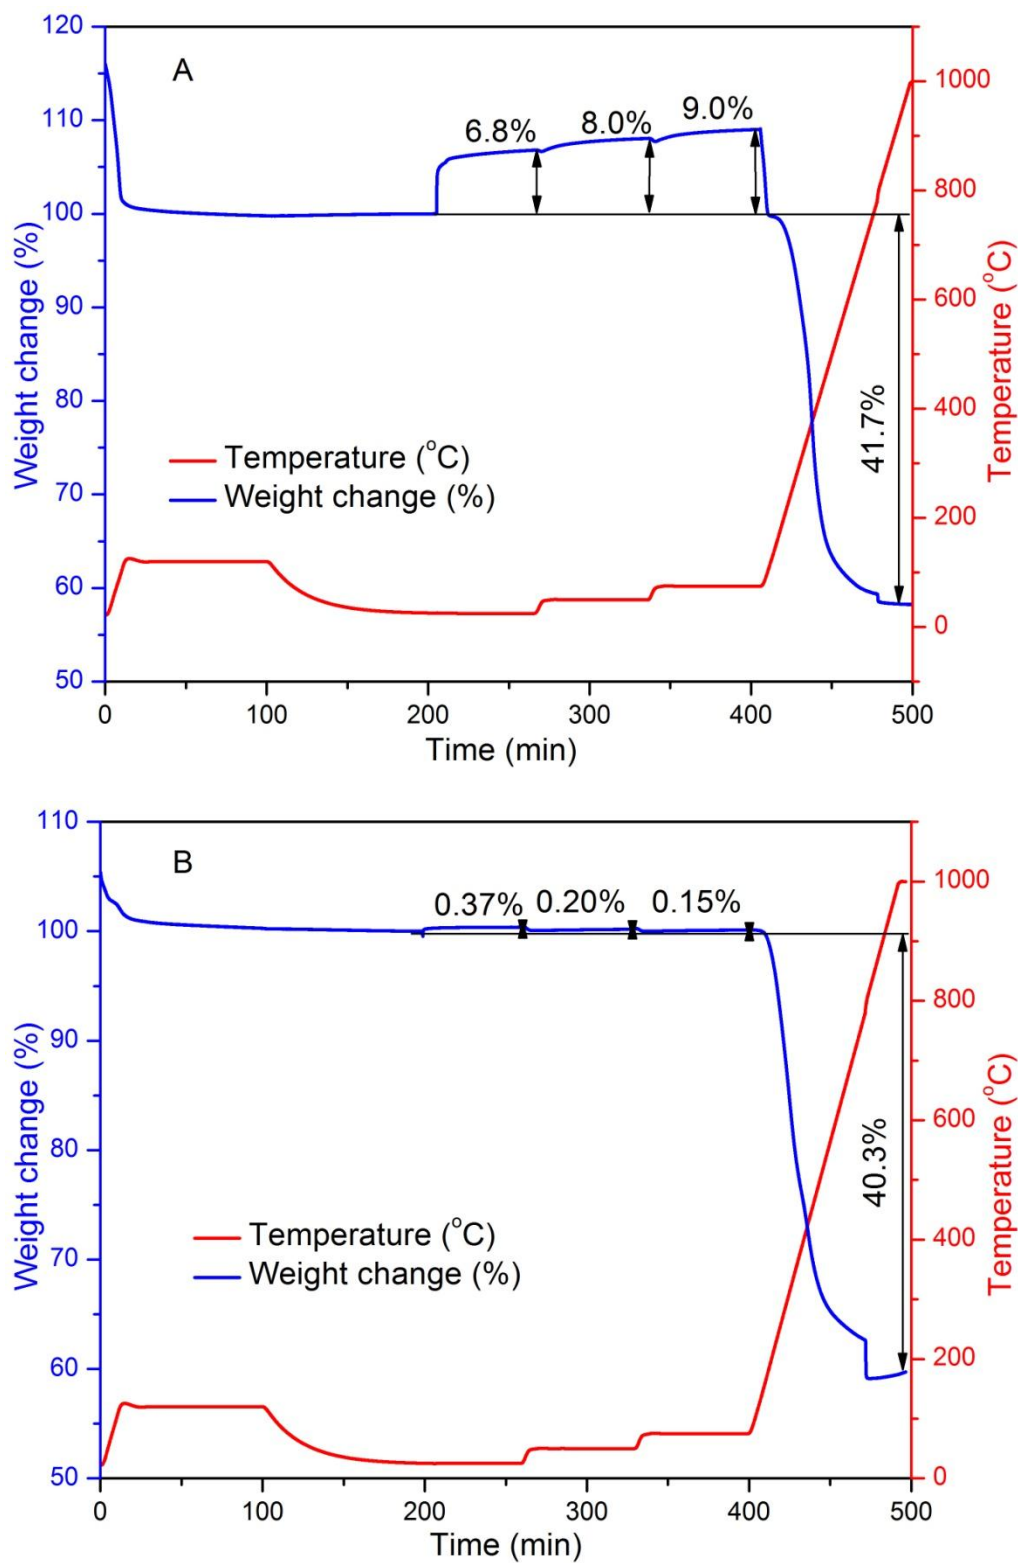

Fig. S2 CO<sub>2</sub> adsorption of BPEI before (A) and after (B) deactivation.

Table S1 CO<sub>2</sub> uptake of the adsorbent before and after deactivation.

| Sample | Air treatment <sup>(a)</sup> | CO <sub>2</sub> uptake (%) at 75 °C |                     | Degree of deactivation (%) |
|--------|------------------------------|-------------------------------------|---------------------|----------------------------|
|        |                              | Before air-treatment                | After air-treatment |                            |
| LPEI   | 110 °C                       | 7.4                                 | 3.4                 | 54                         |
| BPEI   | 120 °C                       | 9.0                                 | 0.15                | 98                         |

<sup>(a)</sup> air treatment for 24 h.

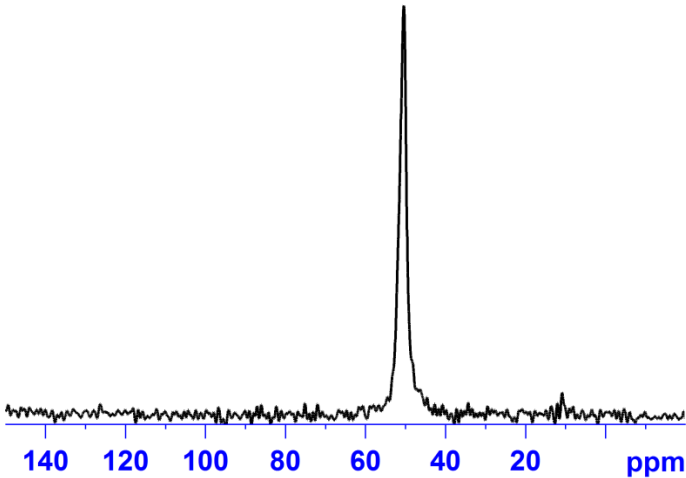

Fig. S3 <sup>13</sup>C NMR spectrum of fresh LPEI.

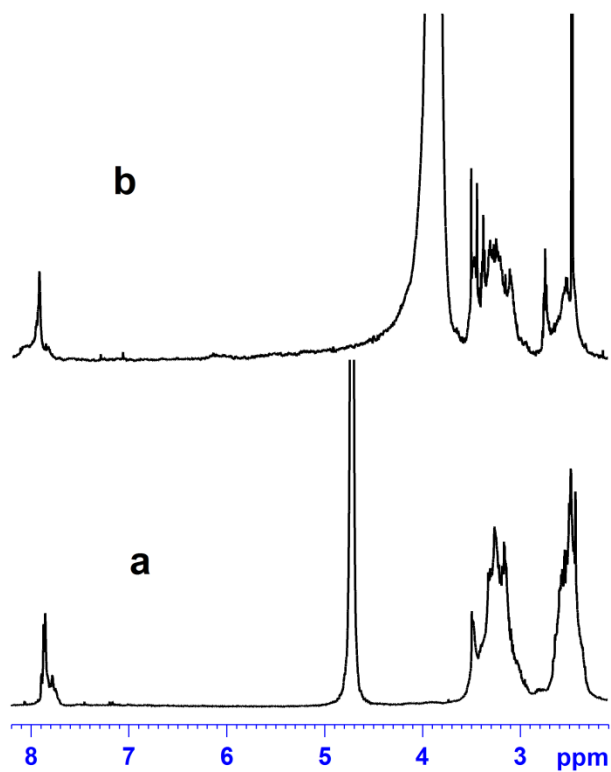

Fig. S4 <sup>1</sup>H NMR spectrum of BPEI solution in a) 1.5 mM KOH/D<sub>2</sub>O, and b) DMSO-d<sub>6</sub> deactivated in air at 110 °C for 24 h.

In Figure S4b, the broad peak centered at 3.7 ppm originates from hygroscopic properties of DMSO and is assigned to H<sub>2</sub>O in DMSO-d<sub>6</sub>. In addition, <sup>1</sup>H-<sup>13</sup>C HMQC NMR of this solution was devoid of any correlations between this proton and a carbon atom.

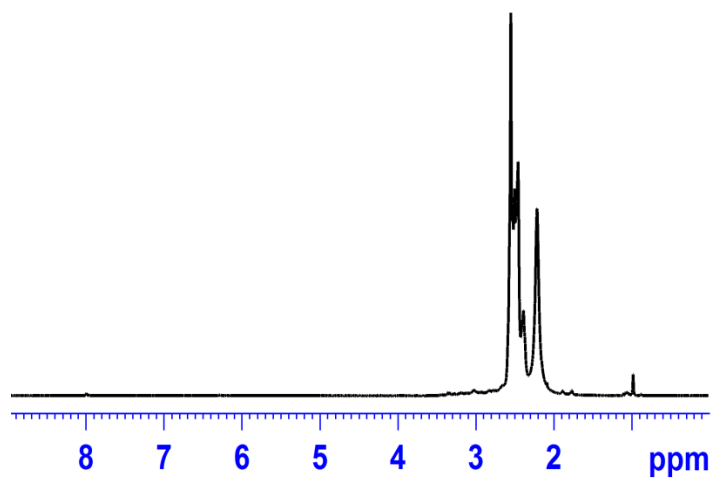

Fig. S5  $^1\text{H}$  NMR spectrum of fresh BPEI in  $\text{DMSO-d}_6$ .

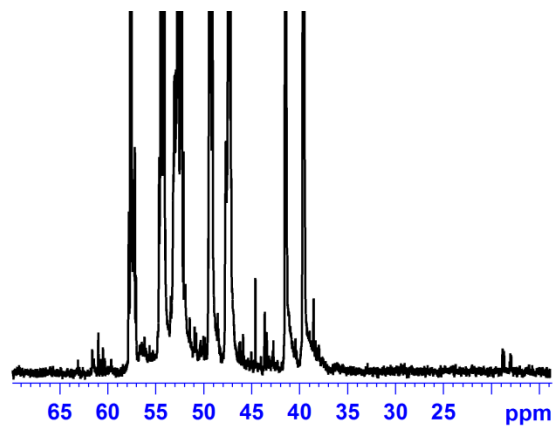

Fig. S6  $^{13}\text{C}$  NMR spectrum of fresh BPEI in  $\text{DMSO-d}_6$ .

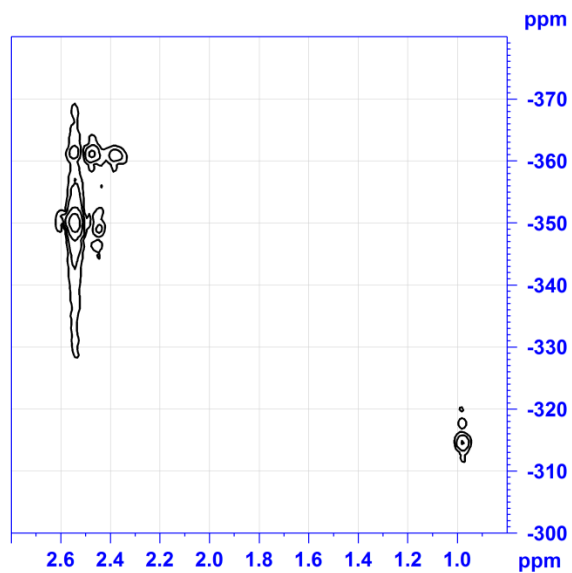

Fig. S7  $^1\text{H}$ - $^{15}\text{N}$  HMBC NMR spectrum of fresh BPEI.

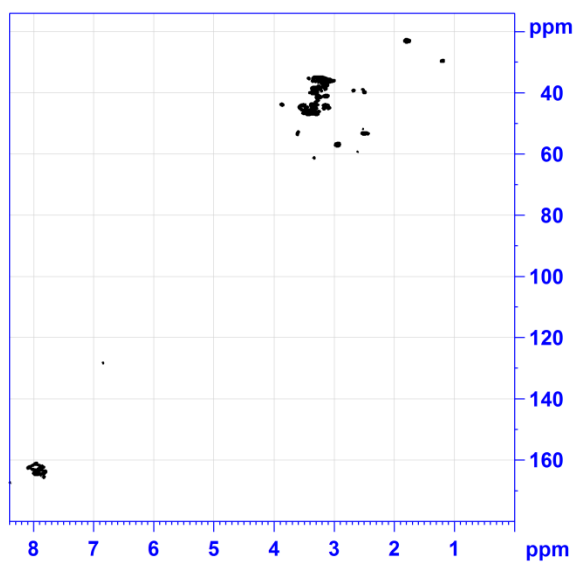

Fig. S8  $^1\text{H}$ - $^{13}\text{C}$  HMQC NMR spectrum of air-deactivated BPEI in  $\text{DMSO-d}_6$ .

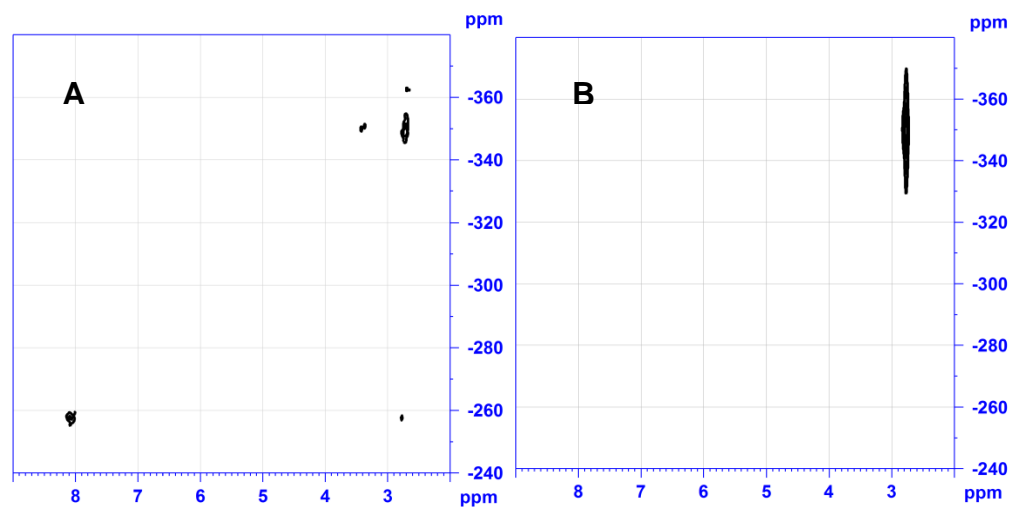

Fig. S9  $^1\text{H}$ - $^{15}\text{N}$  HMBC spectrum of (A) air-deactivated LPEI, and (B) fresh LPEI.
